# Supplementary material for: Numb positively regulates Hedgehog signaling at the ciliary pocket
Source: PubMed Central journal article supplement (PMC11045789; doi:10.1038/s41467-024-47244-1), 2024-04-25
Supplement: 41467_2024_47244_MOESM3_ESM.pdf [file 41467_2024_47244_MOESM3_ESM.pdf]

## Description of Additional Supplementary Files

### File Name: Supplementary Data 1

**Description:** Candidates in "Without Shh": the intersection of candidates that meet the criteria in Supplementary Figure 3b and 3c.

Fold change (FC) and adjusted p-value represent Supplementary Figure 3C: (CiliumTurboID: - Shh+biotin)/ (NonCiliumTurboID: +Shh+biotin)

Candidates in "With Shh": the intersection of candidates that meet the criteria in Supplementary Figure 3d and 3e.

Fold change (FC) and adjust p-value represent Supplementary Figure 3e : (CiliumTurboID: +Shh+biotin)/ (NonCiliumTurboID: +Shh+biotin) The P values were adjusted for multiple testing via the Benjamini-Hochberg procedure

### File Name: Supplementary Data 2

**Description:** Proteins in this table are the candidates in the union of the two lists in Supplementary Data 1.

Fold change (FC) and adjusted p-value shown in this table represent Figure 2d: (CiliumTurboID: +Shh+biotin)/ (CiliumTurboID: -Shh+biotin).

The P values were adjusted for multiple testing via the Benjamini-Hochberg procedure.
